# Supplementary material for: Costs and Causes of Oncology Drug Attrition With the Example of Insulin-Like Growth Factor-1 Receptor Inhibitors
Source: PubMed Central journal article supplement (PMC10383012; doi:10.1001/jamanetworkopen.2023.24977), 2023-07-28
Supplement: jamanetwopen-e2324977-s003.pdf [file jamanetwopen-e2324977-s003.pdf]

## Data Sharing Statement

Jentzsch. Costs and Causes of Oncology Drug Attrition With the Example of Insulin-Like Growth Factor-1 Receptor Inhibitors. *JAMA Netw Open*. Published July 28, 2023.  
doi:10.1001/jamanetworkopen.2023.24977

### Data

**Data available:** Yes

**Data types:** Deidentified participant data

**How to access data:** Supplementary Excel eTables S1 and S2

**When available:** With publication

### Supporting Documents

**Document types:** Other (please specify)

**Additional Information:** Discussion of the costs of drug development

**How to access documents:** Supplementary discussion

**When available:** With publication

### Additional Information

**Who can access the data:** anyone who asks for it

**Types of analyses:** Expenses associated with clinical trials

**Mechanisms of data availability:** Online Excel files

**Any additional restrictions:** None
